# Supplementary material for: In Silico Structural Analysis Predicting the Pathogenicity of PLP1 Mutations in Multiple Sclerosis
Source: MDPI journal article supplement (doi:10.3390/brainsci13010042), 2022-12-24
Supplement: s1 [file s1]

# Supplementary Material

## In Silico Structural Analysis Predicting the Pathogenicity of PLP1 Mutations in Multiple Sclerosis

Antigoni Avramouli, Marios G. Krokidis \*, Themis P. Exarchos and Panagiotis Vlamos

Bioinformatics and Human Electrophysiology Laboratory, Department of Informatics, Ionian University, 491 00 Corfu, Greece

\*Correspondence: mkrokidis@ionio.gr

**Table S1.** Prediction of pathogenicity of amino acid substitutions and their molecular mechanisms of *PLP1* variants provided by MutPred2

| Variant | MutPred2 Score | Molecular mechanism disrupted | Probability | P-value  |
|---------|----------------|-------------------------------|-------------|----------|
| L31P    | 0.973          | Altered Transmembrane protein | 0.33        | 6.8e-05  |
| L31V    | 0.854          | Altered Transmembrane protein | 0.26        | 1.2e-03  |
| L31R    | 0.972          | Altered Transmembrane protein | 0.33        | 4.9e-05  |
| R137W   | 0.684          | Loss of Helix                 | 0.31        | 3.1e-03  |
| H140Y   | 0.556          | Altered Ordered interface     | 0.31        | 2.3e-03, |
|         |                | Altered Transmembrane protein | 0.11        | 0.04     |

**Table S2.** Analysis of missense mutations on protein stability, performed by SDM and DynaMut. DynaMut data (Table 3) are included for comparison.

| DynaMut |                                |               |                                                                               |          | SDM <sup>1</sup>               |               |
|---------|--------------------------------|---------------|-------------------------------------------------------------------------------|----------|--------------------------------|---------------|
| Variant | $\Delta\Delta G$<br>(kcal/mol) | Outcome       | $\Delta\Delta S_{VibENC_{CoM}}$<br>(kcal.mol <sup>-1</sup> .K <sup>-1</sup> ) | Outcome  | $\Delta\Delta G$<br>(kcal/mol) | Outcome       |
| L31V    | -0.133                         | destabilizing | 0.083                                                                         | increase | -0.67                          | destabilizing |
| L31P    | -1.011                         | destabilizing | 0.413                                                                         | increase | -2. 23                         | destabilizing |
| L31R    | -0.256                         | destabilizing | 0.231                                                                         | increase | -0.29                          | destabilizing |
| R137W   | -0.400                         | destabilizing | 0.111                                                                         | increase | 0.25                           | stabilizing   |
| H140Y   | 0.519                          | stabilizing   | -0.063                                                                        | decrease | 0.65                           | stabilizing   |

<sup>1</sup>Site Directed Mutator

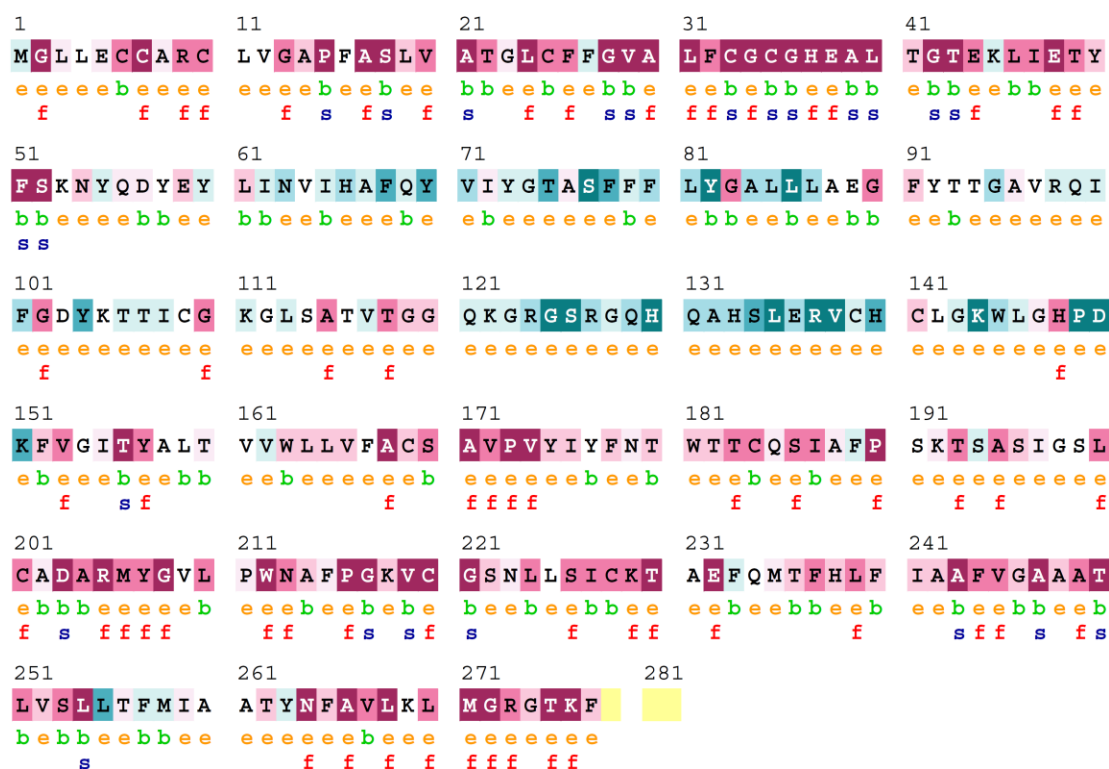

**Figure S1.** Prediction of evolutionary conserved amino acid residues of PLP1, performed by ConSurf server. Conservation score is represented as color coding bars.

e: an exposed residue according to the NACSES algorithm; b: a buried residue according to the NACSES algorithm; f: a predicted functional residue (highly conserved and exposed); s: a predicted structural residue (highly conserved and buried).



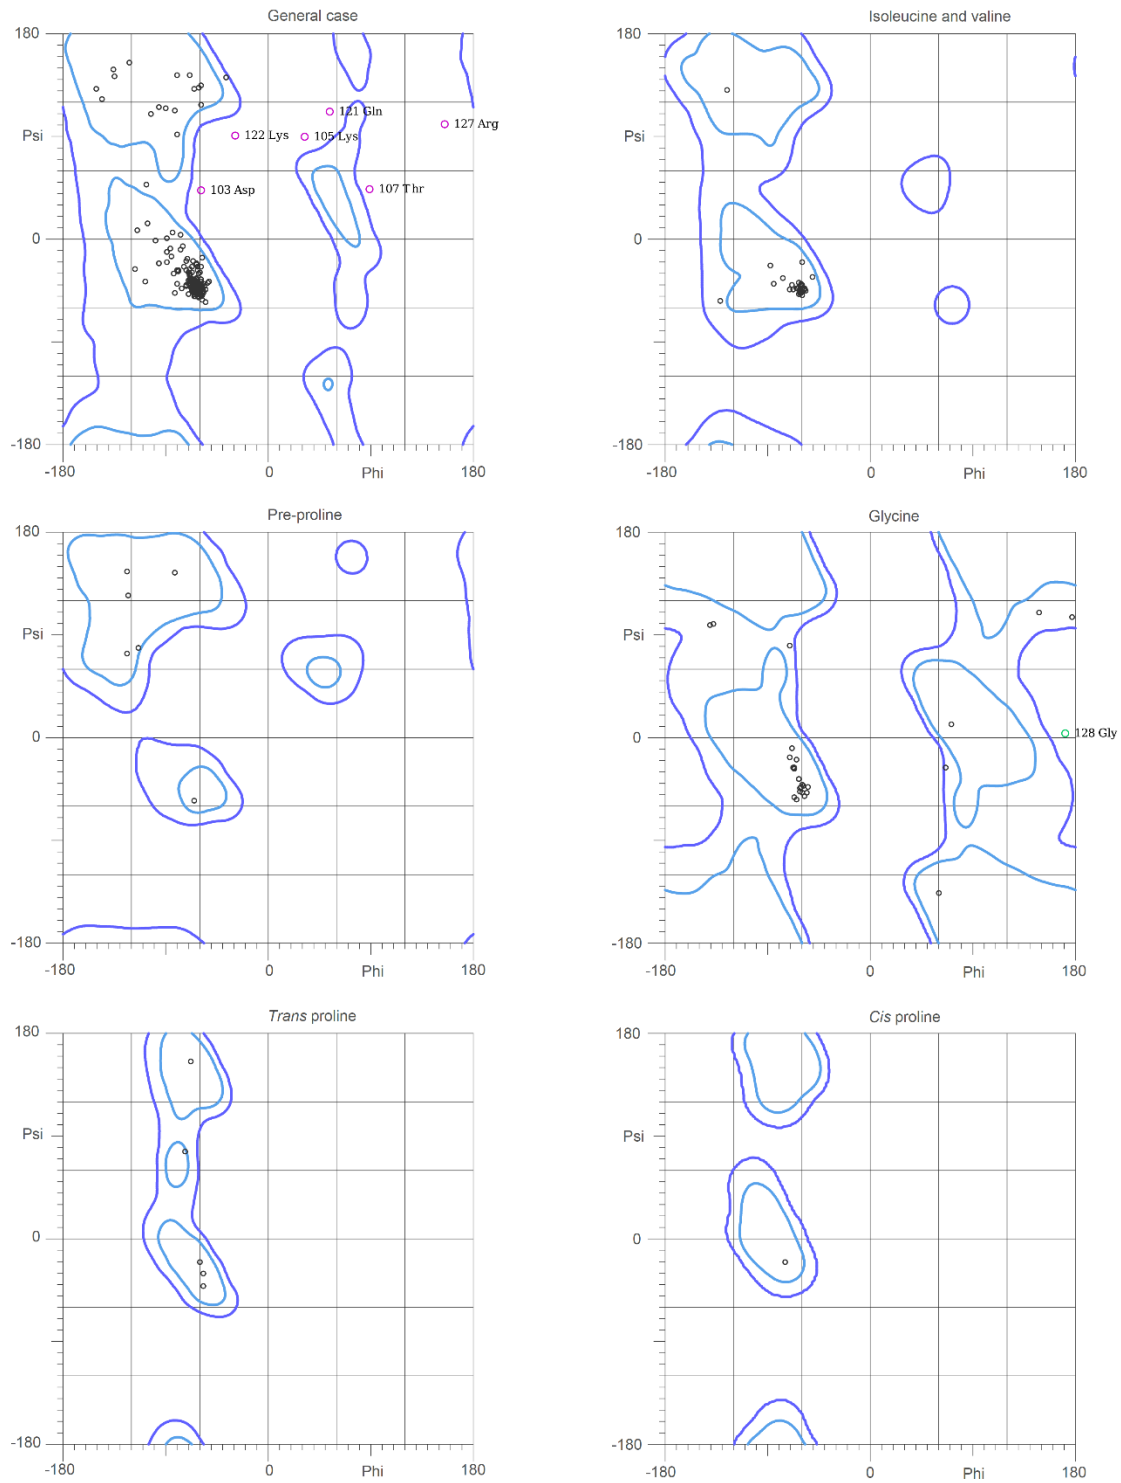

**Figure S3.** Ramachandran plots of PLP1 in the AlphaFold model.

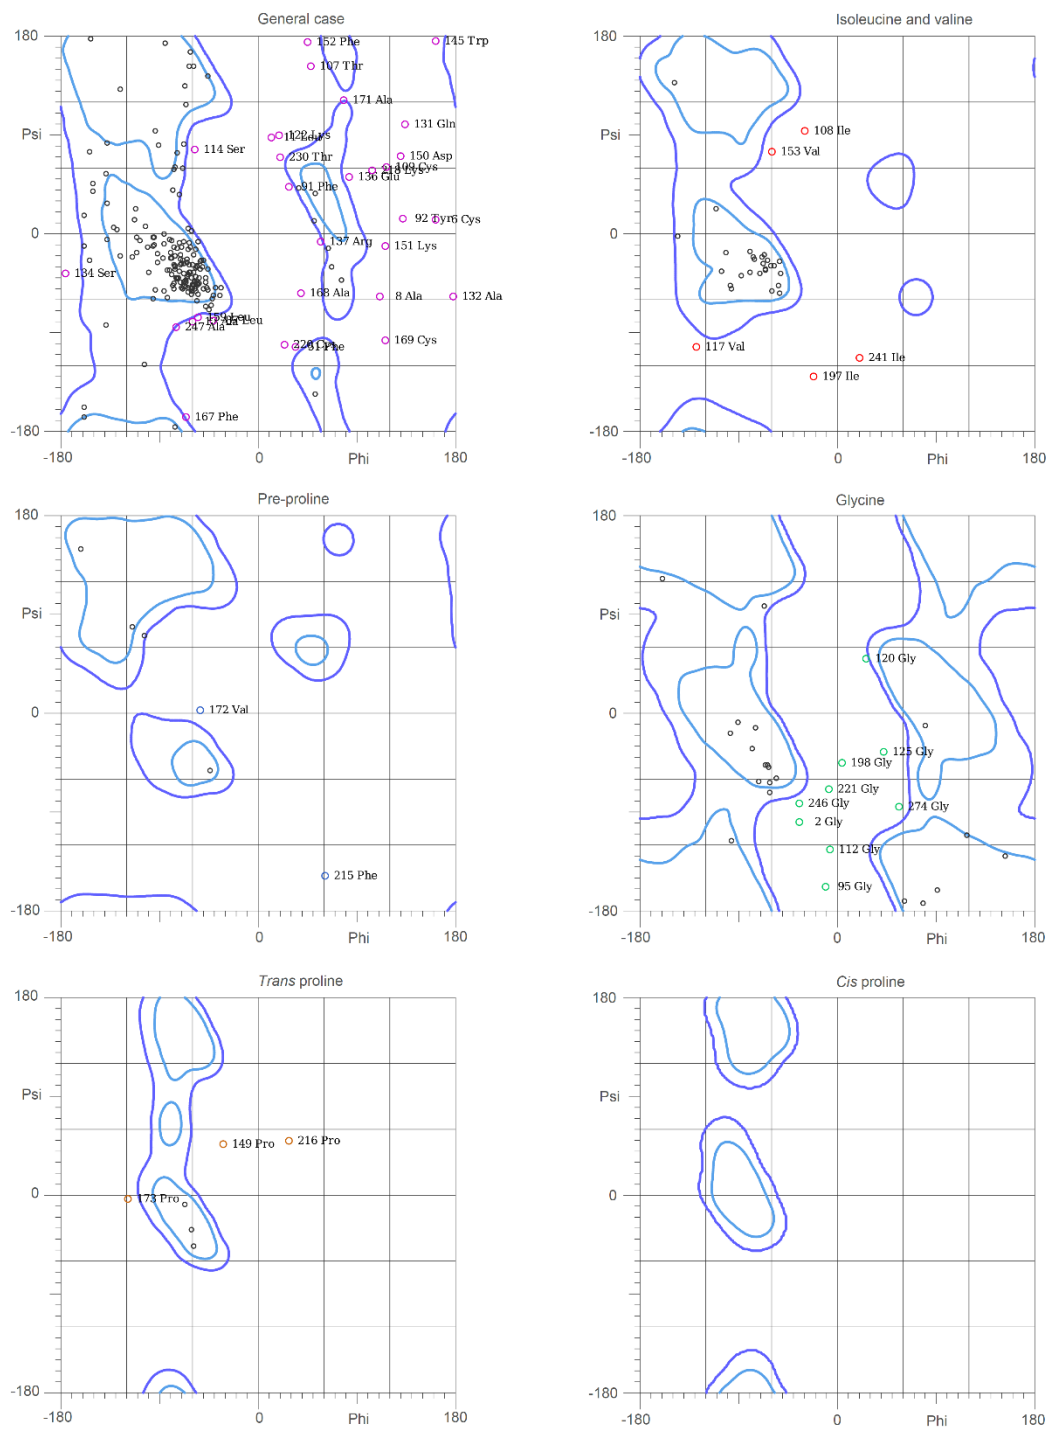

**Figure S4.** Ramachandran plots of PLP1 in the I-Tasser model.
